# Supplementary material for: Extended Interferon-Alpha Therapy Accelerates Telomere Length Loss in Human Peripheral Blood T Lymphocytes
Source: PLoS One. 2011 Aug 4;6(8):e20922. doi: 10.1371/journal.pone.0020922 (PMC3150344; doi:10.1371/journal.pone.0020922)
Supplement: Methods S1 — Telomerase activity measurement in in vitro activated T lymphocytes. (DOC) [file pone.0020922.s003.doc]

# Supplemental methods S1 for Figure S2:

# Extended interferon-alpha therapy accelerates telomere loss in human peripheral blood T lymphocytes

Joel M. O'Bryan,1 James A. Potts,1 Herbert L. Bonkovsky,2,3 Anuja Mathew,1* and Alan L. Rothman1,4 for the HALT-C Trial Group†

1Department of Medicine, University of Massachusetts Medical School, Worcester, Massachusetts, USA

2Department of Medicine, University of Connecticut Health Center, Farmington, Connecticut, USA

3Carolinas Medical Center, Charlotte, North Carolina, USA 28203

4Institute for Immunology and Informatics, University of Rhode Island, Providence, Rhode Island, USA

† This is publication number 61 from the HALT-C Trial Study Group.

* Corresponding author:

Anuja Mathew Ph.D.

University of Massachusetts Medical School

Room S6-862

55 Lake Avenue North

Worcester, MA 01655

Email: Anuja.mathew@umassmed.edu

Phone: 508-856-4182

FAX: 508-856-4890

**Registrations**

The HALT-C trial was registered with clinicaltrials.gov (#NCT00006164).

**In vitro PBMC activation and telomerase activity measurement.**

Telomerase activity in stimulated PBMC was measured using a commercial PCR-based, real-time telomerase repeat activity protocol kit (RT-TRAP, Millipore, Billerica, MA) per manufacturer’s instructions. Briefly, 106 PBMC from each patient time point sample were stimulated for three days with plate-bound anti-CD3 (clone OKT3, BD) and anti-CD28 (clone 28.1, BD) each at 3 μg/mL in 2 mL complete RPMI-1640 media (Gibco-Invitrogen) with 10% fetal calf serum. Cell lysate extracts were prepared from harvested cells pellets and placed in -80oC frozen aliquots per manufacturer’s instructions using provided CHAPS lysis buffer. RT-TRAP was performed per manufacturer’s instructions using 2000 cell equivalents per test well on a 96-well PCR plate. Real-time PCR was performed on an ABI Prism 7300 (Applied Biosciences). Using the unit equipped, real-time software (SDS v1.4), triplicate-averaged sample fluorescence threshold crossing (Ct) values were converted, using kit-provided controls and template standards and the resulting standard curve template control values, to a mean telomerase product quantity for each sample. Telomerase activity (TA) results are a ratio of a triplicate-derived mean quantity to the same-plate, negative control mean quantity.
